# Supplementary material for: Differences in nanoscale organization of DNase I hypersensitive and insensitive chromatin in single human cells
Source: bioRxiv or medRxiv preprint supplement (doi:10.1101/2021.05.27.445943), 2021-05-27
Supplement: Supplementary file [file media-1.pdf]

## **Supplementary information**

### **Differences in nanoscale organization of DNase I hypersensitive and insensitive chromatin in single human cells**

**Brandstetter et al.**

**Supplementary Figures 1 – 5**

**Supplementary Table 1 – 4**

## Supplementary figures with explanation

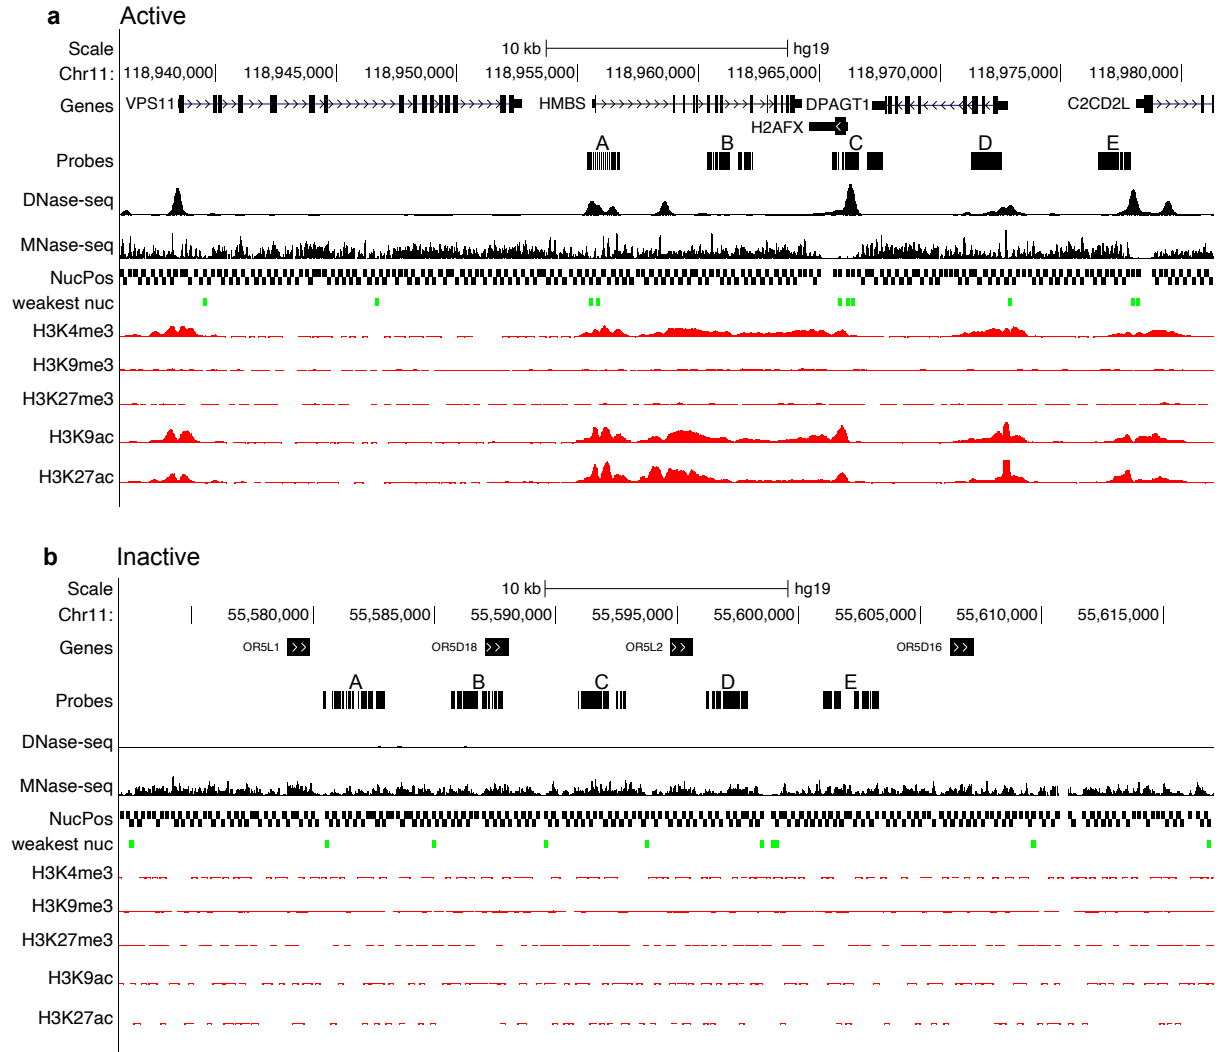

**Supplementary Figure 1:** Active (a) and inactive (b) genomic regions with genes, probe sets (A-E), DNase-seq, MNase-seq, nucleosome positions from NucPosSimulator, the weakest nucleosomes calculated by NucPosSimulator, H3K4me3, H3K9me3, H3K27me3, H3K9ac, H3K27ac. Tracks show that inactive region has almost no histone modifications while the active region contains active marks like H3K4me3, H3K9ac and H3K27ac. Notably, most of the weakest nucleosomes for the active region are located at DNase I hypersensitive sites.

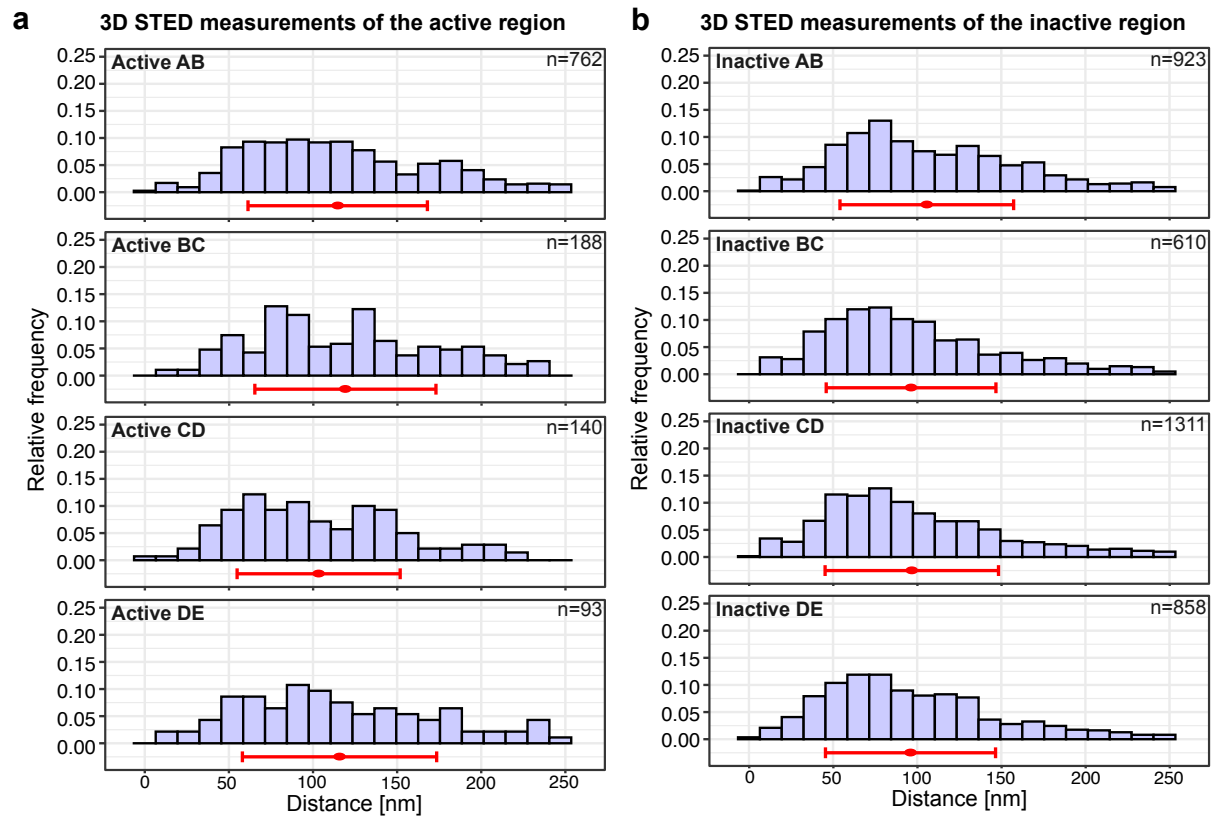

**Supplementary Figure 2:** Distance histograms from 3D STED measurements for all four intervals (AB, BC, CD, DE) in active (a) and inactive (b). The mean for each histogram is indicated by the red dot and the standard deviation by the red line. N-numbers can be found next to the respective histogram (for statistical data, see Supplementary Table 2).

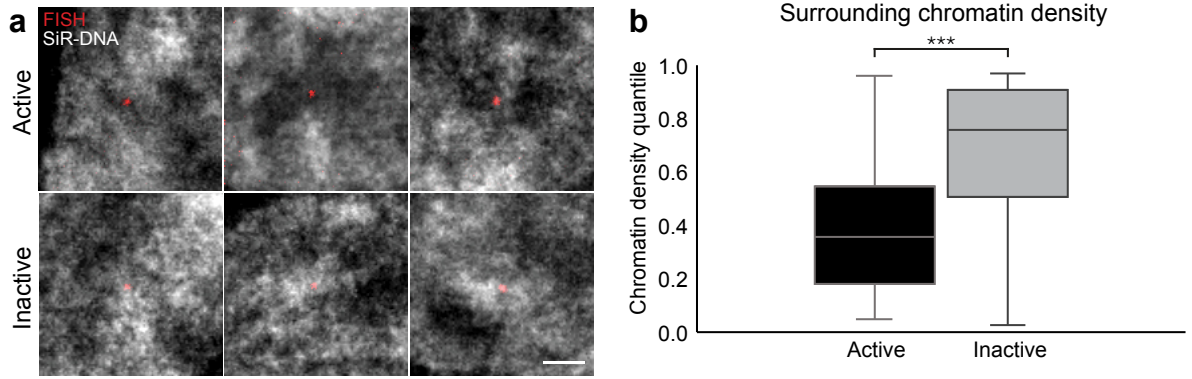

**Supplementary Figure 3:** Chromatin environment of the active and inactive region. (a) Representative images for the active (upper row) and inactive (lower row) region labeled with one FISH probe set (red) and chromatin labeled with SiR-DNA (gray). Scale bar = 1  $\mu\text{m}$ . (b) Chromatin density quantile for active (black,  $n=43$ ) and inactive (gray,  $n=38$ ) differ significantly (two-sided Wilcoxon rank sum test,  $p = 9.890 \times 10^{-6}$ ). Inactive region is embedded in higher density chromatin, while active chromatin is surrounded by lower density chromatin.

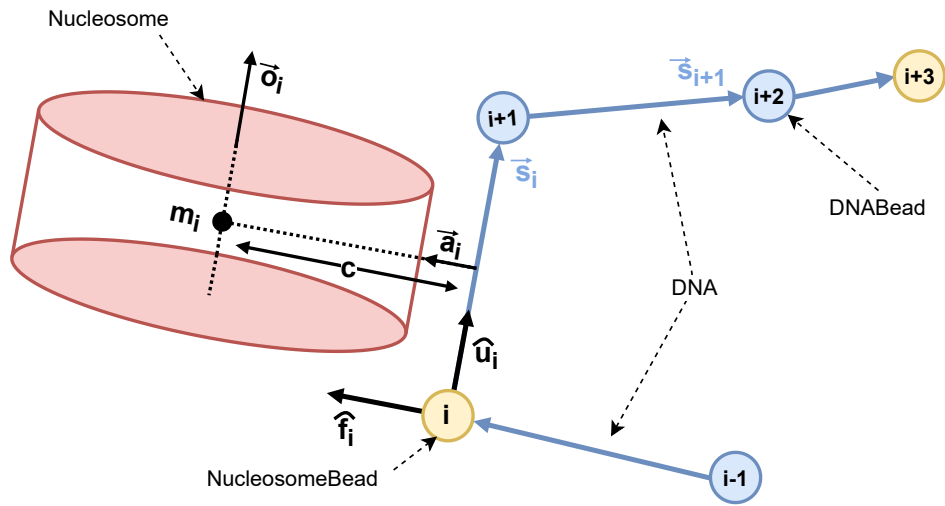

**Supplementary Figure 4:** Model of a nucleosome chain.  $i$  represents the position of the bead in the chain, yellow circles indicate nucleosome bead positions, and blue circles indicate DNA bead positions. The nucleosome is represented by a red cylinder. The segment vector  $\vec{s}_i$  points from one bead to the next bead. A local coordination system  $(\hat{u}_i, \hat{v}_i, \hat{f}_i)$  (not shown) describes the orientation of a bead. Vector  $\vec{a}_i$  describes the direction from the center of the segment to the nucleosome center  $m_i$ ,  $c$  is its length, and vector  $\vec{o}_i$  describes the orientation of the nucleosome. Vector  $\vec{a}_i$  is defined by two rotations of vector  $\hat{v}_i$  (i) around  $\vec{u}_i$  by the angle  $\varepsilon$  (not shown), (ii) around vector  $\hat{f}_i$  by the angle  $\phi$  (not shown).

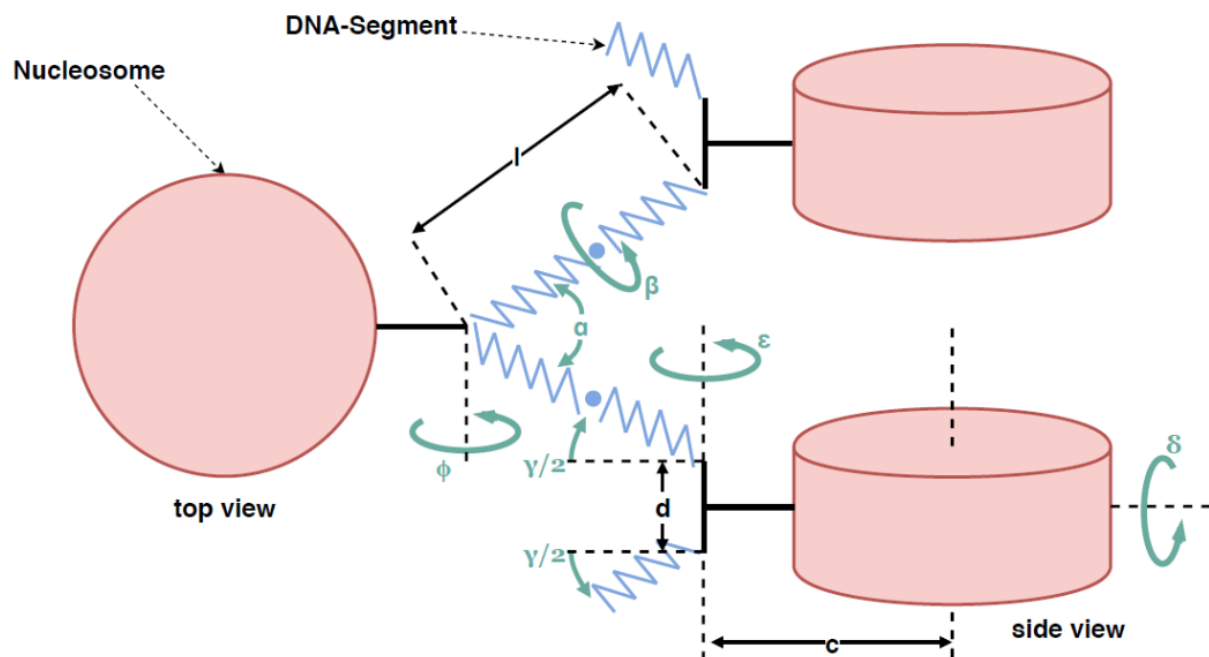

**Supplementary Figure 5:** The relative orientation of the nucleosome is described by the angles  $\alpha, \delta, \epsilon, \gamma, \phi$  (modified from (Rippe et al., 2012)).  $\beta$  is the torsional orientation of subsequent nucleosomes.  $l$  is the length of the DNA modeling the linker DNA,  $d$  the distance between the entry and the exit point of the linker DNA at the nucleosome,  $c$  the distance between the center of the nucleosome segment and the center of the oblate sphero-cylinder modeling of the nucleosome.

## Supplementary tables with explanation

### Supplementary Table 1: Statistical data for 2D STED datasets

Test: Wilcoxon rank sum test with continuity correction

Correction method: Bonferroni holm correction for multiple testing

Software: R studio

p-values for Active AB – BC – CD – DE

|                  | Active AB | Active BC | Active CD |
|------------------|-----------|-----------|-----------|
| <b>Active BC</b> | 0.03220   | -         | -         |
| <b>Active CD</b> | 0.02706   | 0.80123   | -         |
| <b>Active DE</b> | 0.18970   | 0.00053   | 0.00053   |

p-values for Inactive AB – BC – CD – DE

|                    | Inactive AB      | Inactive BC | Inactive CD |
|--------------------|------------------|-------------|-------------|
| <b>Inactive BC</b> | $3.3 * 10^{-7}$  | -           | -           |
| <b>Inactive CD</b> | $5.8 * 10^{-9}$  | 0.451       | -           |
| <b>Inactive DE</b> | $1.2 * 10^{-12}$ | 0.071       | 0.451       |

p-value for all active vs. all inactive

|                 | Active          |
|-----------------|-----------------|
| <b>Inactive</b> | $<2 * 10^{-16}$ |

### Supplementary Table 2: Statistical data for 3D STED datasets

Test: Wilcoxon rank sum test with continuity correction

Correction method: Bonferroni holm correction for multiple testing

Software: R studio

Significant:  $p < 0.05$

p-values for Active AB – BC – CD – DE

|                  | Active AB | Active BC | Active CD |
|------------------|-----------|-----------|-----------|
| <b>Active BC</b> | 0.895     | -         | -         |
| <b>Active CD</b> | 0.138     | 0.076     | -         |
| <b>Active DE</b> | 1.000     | 1.000     | 0.525     |

p-values for Inactive AB – BC – CD – DE

|                    | Inactive AB     | Inactive BC | Inactive CD |
|--------------------|-----------------|-------------|-------------|
| <b>Inactive BC</b> | $8 * 10^{-4}$   | -           | -           |
| <b>Inactive CD</b> | $8.3 * 10^{-5}$ | 1.000       | -           |
| <b>Inactive DE</b> | $9.4 * 10^{-5}$ | 1.000       | 1.000       |

p-value for all active vs. all inactive

|                 | Active          |
|-----------------|-----------------|
| <b>Inactive</b> | $<2 * 10^{-16}$ |

**Supplementary Table 3: Simulation Parameters and Constants**

|                 |                                                              |                                                                                                                |
|-----------------|--------------------------------------------------------------|----------------------------------------------------------------------------------------------------------------|
| $e_c$           | $1.602 \times 10^{-19} \text{ C}$                            | Electric charge unit                                                                                           |
| $v$             | $-2/0.34 e_c \text{ nm}^{-1}$                                | Line charge density of DNA                                                                                     |
| $\rho$          | $0.1 \times 10^{24} \text{ mol nm}^{-3}$                     | Molarity of the monovalent solution                                                                            |
| $N_A$           | $6.022 \times 10^{23} \text{ mol}^{-1}$                      | Avogadro constant                                                                                              |
| $\varepsilon$   | 80                                                           | Value for the dielectric value in the solution                                                                 |
| $\varepsilon_0$ | $(4\pi f)^{-1}$                                              | Dielectric constant                                                                                            |
| $f$             | $138.935 \text{ kJ nm mol}^{-1} e_c^{-2}$                    | Electric conversion factor                                                                                     |
| $k_B$           | $8.314513 \times 10^{-3} \text{ kJ mol}^{-1} \text{ K}^{-1}$ | Boltzmann constant                                                                                             |
| $a$             | 1.2 nm                                                       | Radius of the DNA model sphere                                                                                 |
| $T$             | 293 K                                                        | Temperature of the solution                                                                                    |
|                 | $4 \times 10^7$                                              | simulation steps for internucleosomal interaction strength $4 k_B T$                                           |
|                 | $8 \times 10^7$                                              | simulation steps for internucleosomal interaction strength $8 k_B T$                                           |
|                 | 10 nm                                                        | maximum DNA segment length                                                                                     |
|                 | 5.5 nm                                                       | nucleosome height                                                                                              |
|                 | 11 nm                                                        | nucleosome diameter                                                                                            |
|                 | 293 K                                                        | minimum temperature used for replica exchange procedure                                                        |
|                 | 700 K                                                        | maximum temperature used for replica exchange procedure                                                        |
|                 | 16                                                           | number of temperatures used for replica exchange procedure for internucleosomal interaction strength $4 k_B T$ |
|                 | 32                                                           | number of temperatures used for replica exchange procedure for internucleosomal interaction strength $8 k_B T$ |
|                 | $4 k_B T$ and $8 k_B T$ (inactive)                           | $\varepsilon$ for $E_{internuc}$                                                                               |
|                 | 5.5 nm                                                       | $\sigma$ for $E_{internuc}$                                                                                    |
|                 | 665                                                          | $a_{DNA}^{(s)}$                                                                                                |
|                 | 665                                                          | $a_{NUC}^{(s)}$                                                                                                |
|                 | 120.44                                                       | $a_{DNA}^{(b)}$                                                                                                |
|                 | 120.44                                                       | $a_{NUC}^{(b)}$                                                                                                |
|                 | 219.25                                                       | $a_{DNA}^{(t)}$                                                                                                |
|                 | 782.85                                                       | $a_{NUC}^{(t)}$                                                                                                |
|                 | $1.2 \text{ kJ mol}^{-1}$                                    | Lennard jones $\varepsilon$ for DNA                                                                            |
|                 | $2.0 \text{ kJ mol}^{-1}$                                    | Lennard jones $\sigma$ for DNA                                                                                 |
|                 | $S000 = 1.6957$                                              | interaction potential nucleosome s-functions                                                                   |
|                 | $Scc2 = -0.7641$                                             |                                                                                                                |
|                 | $S220 = -0.1480$                                             |                                                                                                                |
|                 | $S222 = -0.2582$                                             |                                                                                                                |
|                 | $S224 = 0.5112$                                              |                                                                                                                |
|                 | $E000 = 2.7206$                                              |                                                                                                                |
|                 | $Ecc2 = 6.0995$                                              |                                                                                                                |
|                 | $E220 = 3.3826$                                              |                                                                                                                |
|                 | $E222 = 7.1036$                                              |                                                                                                                |
|                 | $E224 = 3.2870$                                              |                                                                                                                |



**Supplementary Table 4: Oligo probe genomic coordinates and sequences**

| <b>Chromosome</b> | <b>Start (hg38)</b> | <b>End (hg38)</b> | <b>Oligo name</b> | <b>Sequence</b>                          | <b>Dye</b> |
|-------------------|---------------------|-------------------|-------------------|------------------------------------------|------------|
| chr11             | 119084693           | 119084733         | ActiveA_947       | AAACTTAGCTTTGCTACAACCTTGAAATAGGCAGCATTTT | ATTO647N   |
| chr11             | 119084735           | 119084775         | ActiveA_948       | AGCAAGTAGTGCAGCTTCTATGGCGCTTCCTTTGCTCTGT | ATTO647N   |
| chr11             | 119084777           | 119084817         | ActiveA_949       | GGACCTCCCCATTCGACCACCCCATTCCCCAGCTGTGACA | ATTO647N   |
| chr11             | 119084819           | 119084859         | ActiveA_950       | GAGGTCCCTCCCTCTGGGCGGGAATTGGAACATTGCGACA | ATTO647N   |
| chr11             | 119084861           | 119084901         | ActiveA_951       | CCGCAGAGCCTCGCGTCACTTCCGGCGCCCTCCCTCGAAG | ATTO647N   |
| chr11             | 119084903           | 119084943         | ActiveA_952       | CACGTGGGACCCGAGGTCGTCCTACAGTCTGACTCCTGGT | ATTO647N   |
| chr11             | 119084945           | 119084985         | ActiveA_953       | GGCCCCGGGAAGCCGGGGGCTCCGGCCGGCGAGTACCGGG | ATTO647N   |
| chr11             | 119084987           | 119085027         | ActiveA_954       | GCTTGAAAGTAGGCTGTGTGTGGGTGCCGCTAAGTCCC   | ATTO647N   |
| chr11             | 119085029           | 119085069         | ActiveA_955       | CACCGCCGTTGCAGCCGCATTGCCGTTACCAGACATGGCT | ATTO647N   |
| chr11             | 119085071           | 119085111         | ActiveA_956       | TCGTCCAGAAGCCCAAAGTGTGCTGGTCACCGGCTCAGCA | ATTO647N   |
| chr11             | 119085113           | 119085153         | ActiveA_957       | AGACGACTGAGGATGGCAACCTGGGGCCAATCGCTGCACG | ATTO647N   |
| chr11             | 119085197           | 119085237         | ActiveA_959       | AACCGAGCTACTGGCCCTTTAAAAGCTACTCGGACCAAAA | ATTO647N   |
| chr11             | 119085239           | 119085279         | ActiveA_960       | CAGTATCACCGCTCTCTGATTTCCCCATTCTTCCGGAGG  | ATTO647N   |
| chr11             | 119085281           | 119085321         | ActiveA_961       | GGGACCGGAGTTCGGTTCCAACAATCCTTCCACTCTTAA  | ATTO647N   |
| chr11             | 119085323           | 119085363         | ActiveA_962       | GTGCATCCCAGGCCTGATGGGAATCCCACCCAGATGCCCG | ATTO647N   |
| chr11             | 119085365           | 119085405         | ActiveA_963       | TGTAGACGAACGTTCTTGGTCTGGGTCACTAAATCTAGAG | ATTO647N   |
| chr11             | 119085407           | 119085447         | ActiveA_964       | GCATCCGCCTCAGCCCAGCCTCGAATGAAAGGACCCCGTC | ATTO647N   |
| chr11             | 119085449           | 119085489         | ActiveA_965       | TGAATCAAAGTGGAAACGTGTCTTCCCAAAGGGGCGTAT  | ATTO647N   |
| chr11             | 119085491           | 119085531         | ActiveA_966       | CGTTTGTGTGCAGTTCGGAGGCTTGGCTGATACTCTCTCC | ATTO647N   |
| chr11             | 119085533           | 119085573         | ActiveA_967       | TGGGAGACCACTATAACACAAAAAGAAGGCGCACTTCTAA | ATTO647N   |
| chr11             | 119085575           | 119085615         | ActiveA_968       | GTAGGTGTGTCACAGCTGGGGACTTGGAGCGTTGGCTGTG | ATTO647N   |
| chr11             | 119085617           | 119085657         | ActiveA_969       | TGGAAAGGCCACGGCGGCCTCCCACCCACGGTAGTAATT  | ATTO647N   |
| chr11             | 119085659           | 119085699         | ActiveA_970       | TTGTCTGTGCACAAGCCCAGGGCTCGGCAAGCAGGCTCGT | ATTO647N   |
| chr11             | 119085701           | 119085741         | ActiveA_971       | TTCTTATCTCGGCCTGGCAGTGGCCTCCACCAGCTCTGCA | ATTO647N   |
| chr11             | 119085743           | 119085783         | ActiveA_972       | CCAACAGGCTGGACAGGGGGAGATTAGCAGCTCCCCATCT | ATTO647N   |

|       |           |           |              |                                          |          |
|-------|-----------|-----------|--------------|------------------------------------------|----------|
| chr11 | 119085785 | 119085825 | ActiveA_973  | AGGGCTCTGGAATGACTGCAAGAGCAAAGATCCCAGCCCT | ATTO647N |
| chr11 | 119085827 | 119085867 | ActiveA_974  | AGAGAGTTGGGGCCACAATTCAGATCTTCCTACTCCTAGT | ATTO647N |
| chr11 | 119085911 | 119085951 | ActiveA_976  | CACCTTTGGGACCATGTTACAGAAGCAACGGGTGGCATCA | ATTO647N |
| chr11 | 119085953 | 119085993 | ActiveA_977  | ATTGTTGTCGTCTCAAAAATCCTATCAGGTGGACAAGACA | ATTO647N |
| chr11 | 119085995 | 119086035 | ActiveA_978  | AAAACACTGAGCACTTCTATGTTGAAGCTATTGCTTTTGC | ATTO647N |
| chr11 | 119089649 | 119089689 | ActiveB_1065 | GTCCACTCTATAGAGATGGGAGAGGGGGGCAAAGAGAAAG | ATTO594  |
| chr11 | 119089691 | 119089731 | ActiveB_1066 | AGGAAGCACAGTGGGCAGGTCCTTCAAGGAGTGAACAACC | ATTO594  |
| chr11 | 119089733 | 119089773 | ActiveB_1067 | GCAAGACTCTTACTTGCAGATGGCTCCGATGGTGAAGCCA | ATTO594  |
| chr11 | 119089775 | 119089815 | ActiveB_1068 | AAAGGTTACATGATGCCTACCCCTGCCAAGCCCTTAC    | ATTO594  |
| chr11 | 119089817 | 119089857 | ActiveB_1069 | AGATAACCCTGAAGCAGAGGGTCAGGCCCCAAAGGGAAAG | ATTO594  |
| chr11 | 119089901 | 119089941 | ActiveB_1071 | GATCACCTCTATTCTCTCTCGATTGCCAACTCACTGGTAT | ATTO594  |
| chr11 | 119089985 | 119090025 | ActiveB_1073 | GGGTGAAAGACAACAGCATCATGAGGGTTTTCCCGCCTGG | ATTO594  |
| chr11 | 119090027 | 119090067 | ActiveB_1074 | CTCTTCTCTGGCAGGGTTTCTAGGGTCTTCCCAACAAATT | ATTO594  |
| chr11 | 119090069 | 119090109 | ActiveB_1075 | CTGGGCACATCCCACCAAGCTGCCTATCCAGGCCCCACTT | ATTO594  |
| chr11 | 119090153 | 119090193 | ActiveB_1077 | CACACTGCCCAGAGAGAAGTTACAATGAGATTTTAACACT | ATTO594  |
| chr11 | 119090195 | 119090235 | ActiveB_1078 | TCTCTGCAGCTGGGCTGCTCTTCGCAGGGAGCTGGTTCCC | ATTO594  |
| chr11 | 119090237 | 119090277 | ActiveB_1079 | CTAAAAGGATACAATACTCCTGAACTCCAGATGCGGGAAC | ATTO594  |
| chr11 | 119090279 | 119090319 | ActiveB_1080 | GCTGCTGTCTCCGTCACTCTTCCAAAAGGATCCGTCACTC | ATTO594  |
| chr11 | 119090321 | 119090361 | ActiveB_1081 | CTCCGGACTCCCAGAGCCCTCTAGACCTTGTCTTTTTCT  | ATTO594  |
| chr11 | 119090363 | 119090403 | ActiveB_1082 | GCCACTGACCCACGGGCTGCTTGCTGGAAGCCCCTTCCA  | ATTO594  |
| chr11 | 119090405 | 119090445 | ActiveB_1083 | CTGTAAATGAGTGGACGGATGAGTGCATGGAAAGACAGAC | ATTO594  |
| chr11 | 119090447 | 119090487 | ActiveB_1084 | CTTGCACTCTGAACACTTGTCTGGGGCTAAGAAAACATTA | ATTO594  |
| chr11 | 119090489 | 119090529 | ActiveB_1085 | ATGCAGGGAATGTTTATCTTGCTCACCATTATCCCAAT   | ATTO594  |
| chr11 | 119090531 | 119090571 | ActiveB_1086 | AGTATAACTGCATTATCCCTAAGTAAGACGTAAACTCTAC | ATTO594  |
| chr11 | 119090573 | 119090613 | ActiveB_1087 | GAAGTACTCCCTATCCCTCCAGAAGTAGTCACTATTAGT  | ATTO594  |
| chr11 | 119090909 | 119090949 | ActiveB_1095 | CAAGACAATATAGTAGCATATAAAAATGGAAGTACTGACC | ATTO594  |
| chr11 | 119090951 | 119090991 | ActiveB_1096 | AATTTAGTTTTATGAAATGTACTACATATTCATTGTAATA | ATTO594  |

|       |           |           |              |                                           |         |
|-------|-----------|-----------|--------------|-------------------------------------------|---------|
| chr11 | 119090993 | 119091033 | ActiveB_1097 | CCCAACTTCACTTATTGGAGCACTTAGCACATACTATTTT  | ATTO594 |
| chr11 | 119091035 | 119091075 | ActiveB_1098 | CTTCTGTGTTTAGATGTTCCAAGTAAAGTTTCCAGAAAA   | ATTO594 |
| chr11 | 119091203 | 119091243 | ActiveB_1102 | CTGCTCTAAAAGTACTTTCCATATGTCAGCTCATTTCATC  | ATTO594 |
| chr11 | 119091287 | 119091327 | ActiveB_1104 | AGCTGGCTGACTTTTCAGTCATCTTCCAGCTCTCAGCTTAA | ATTO594 |
| chr11 | 119091329 | 119091369 | ActiveB_1105 | CCTCGTGCGGTTCCCTCTGCCTGAGTCTGTCTTTCCCTCT  | ATTO594 |
| chr11 | 119091371 | 119091411 | ActiveB_1106 | TGTGGAGAGTTGCTAAGGACCACAGTGTCTGGGCAATCTGG | ATTO594 |
| chr11 | 119091413 | 119091453 | ActiveB_1107 | TGCTCGTCCAGCTTCCGAAGCCGGGTGTTGAGTTTCCCC   | ATTO594 |
| chr11 | 119091455 | 119091495 | ActiveB_1108 | TGCAGGCCAGCTGTTGCCAGGATGATGGCACTGAACTCCT  | ATTO594 |
| chr11 | 119091497 | 119091537 | ActiveB_1109 | GCAGGCCCTACCTGCCCCACCCGGTTGTGCCAGCCCATGC  | ATTO594 |

|       |           |           |              |                                           |          |
|-------|-----------|-----------|--------------|-------------------------------------------|----------|
| chr11 | 119094857 | 119094897 | ActiveC_1189 | ACCACCGCCCTCATGGAAAGAGCTGAGCCGCTTCAGACTG  | ATTO647N |
| chr11 | 119094899 | 119094939 | ActiveC_1190 | GCCAGGCCTCCCCATGCCACCACAAAGGCCCTTTTAAGGG  | ATTO647N |
| chr11 | 119094941 | 119094981 | ActiveC_1191 | GGCCTCCAGGAGTACTAAGAGGGCCCGCGCCGCGGCCGG   | ATTO647N |
| chr11 | 119094983 | 119095023 | ActiveC_1192 | CGTGGGGCCGAAGGCGCCCTCGGGCGGCAAGAAGGCCACC  | ATTO647N |
| chr11 | 119095067 | 119095107 | ActiveC_1194 | GCTGCTGGGCGGCGTGACGATCGCCCAGGGAGGCGTCCTG  | ATTO647N |
| chr11 | 119095277 | 119095317 | ActiveC_1199 | CCCAGTGGGCCGTGTACACCGGCTGCTGCGGAAGGGCCAC  | ATTO647N |
| chr11 | 119095361 | 119095401 | ActiveC_1201 | CGTAGCATGTGCGGGCCGCGGCAAGACTGGCGGCAAGGCC  | ATTO647N |
| chr11 | 119095403 | 119095443 | ActiveC_1202 | TCTGTTCTAGTGTGTTGAGCCGTCGTGCTTCACCGGTCTAC | ATTO647N |
| chr11 | 119095445 | 119095485 | ActiveC_1203 | CCTCGCGGCGCGCGCGGACAGCAGTTACACTGCGGCGGG   | ATTO647N |
| chr11 | 119095487 | 119095527 | ActiveC_1204 | CAGGAGGGCGCAGAGGTGTGTCCTGGGGGCTTATAAAGGC  | ATTO647N |
| chr11 | 119095529 | 119095569 | ActiveC_1205 | ACCGCAACCAACCGGAGGCGGGTATTGGAGAAAAGAGCCA  | ATTO647N |
| chr11 | 119095571 | 119095611 | ActiveC_1206 | GCGGGCGCGCTCCCTCAGCCGAGCCGCGACACCCAAGGGT  | ATTO647N |
| chr11 | 119095613 | 119095653 | ActiveC_1207 | CCTTTTCTCCCCGGGCAAAAGGTTTTCAAATTCGACCAAT  | ATTO647N |
| chr11 | 119095655 | 119095695 | ActiveC_1208 | TCAGCGGATAGTTGGCAGTCTGCGTGCTACCCCTCCTCCT  | ATTO647N |
| chr11 | 119095697 | 119095737 | ActiveC_1209 | TGTAGTGTAAATCTCGCGCGCTTACAAGGATTGGCTA     | ATTO647N |
| chr11 | 119095739 | 119095779 | ActiveC_1210 | CTCAGACTCCACCCCTTTGGTCTTCCGCTTCTGGTTTCCG  | ATTO647N |
| chr11 | 119095781 | 119095821 | ActiveC_1211 | ATCCTACGCCGGCACAGATTTCCAGACGCTCTCTAGGTG   | ATTO647N |
| chr11 | 119095823 | 119095863 | ActiveC_1212 | GAGGGCTGCAGTAGCTATAATATTGACCCCTTTCCTTTAA  | ATTO647N |

|       |           |           |              |                                           |          |
|-------|-----------|-----------|--------------|-------------------------------------------|----------|
| chr11 | 119095865 | 119095905 | ActiveC_1213 | TCAGGTAGGAGAAGGGAGTAGGGAGTGACTGGACCTGGAA  | ATTO647N |
| chr11 | 119096285 | 119096325 | ActiveC_1223 | GCATGGAGGGCCACAAAATTGAAGTTATCCTGTTTCCTGG  | ATTO647N |
| chr11 | 119096369 | 119096409 | ActiveC_1225 | CAGACCCCGTCTAACAAGAAGTGAACAGAACTGAGACCAA  | ATTO647N |
| chr11 | 119096411 | 119096451 | ActiveC_1226 | GGGGGTA CTCTCCAACAGGATGCCTATCTCTCTGCCCC   | ATTO647N |
| chr11 | 119096453 | 119096493 | ActiveC_1227 | ATTCCTATATGGGCATTTTTGGGTAGATTGGGAGGGGTG   | ATTO647N |
| chr11 | 119096537 | 119096577 | ActiveC_1229 | GATTAGTAAGAACTAAGCAGGGGGCCACATGCTCTCAATG  | ATTO647N |
| chr11 | 119096579 | 119096619 | ActiveC_1230 | GCTCCACGGTGACATGTCATTTGATTGTAATTAAGTGTT   | ATTO647N |
| chr11 | 119096621 | 119096661 | ActiveC_1231 | CTGGTTTTTGGGATAGA ACTTGGGCCAGGGCTAGGAACAC | ATTO647N |
| chr11 | 119096663 | 119096703 | ActiveC_1232 | TATCCACACTCACATTTTCAGAGTCCTGACTCTCAAGGAAC | ATTO647N |
| chr11 | 119096705 | 119096745 | ActiveC_1233 | TTGCAGCCTCATAGGGTGGGATACAGCAGCTTTTTTTGCA  | ATTO647N |
| chr11 | 119096789 | 119096829 | ActiveC_1235 | CGTTTCTTGCCCTCTGCTGACTACTGATTGGATTTTACCT  | ATTO647N |
| chr11 | 119096873 | 119096913 | ActiveC_1237 | TTGCCAGGCCTCTCTCACTCTTCATACTCCTCCAGATTT   | ATTO647N |

|       |           |           |              |                                           |         |
|-------|-----------|-----------|--------------|-------------------------------------------|---------|
| chr11 | 119100569 | 119100609 | ActiveD_1325 | TGCCCTATGGCACCTACTTCAGGGAACCCTTCCTGGTGC   | ATTO594 |
| chr11 | 119100611 | 119100651 | ActiveD_1326 | CTTGGCCTGCATCTGGACTTGGGTAGGTAGTCCTACCACT  | ATTO594 |
| chr11 | 119100653 | 119100693 | ActiveD_1327 | GGCAACACGACCATTGTGGTGCCCAAGCCCTCCGCCCGA   | ATTO594 |
| chr11 | 119100695 | 119100735 | ActiveD_1328 | GCTGCCTCACTACCTCTCCTCATGGTCTATTTACCAACT   | ATTO594 |
| chr11 | 119100737 | 119100777 | ActiveD_1329 | GTA CTGAATCTGCGCTGGCGCCATAAGCTGCTGCTACCTA | ATTO594 |
| chr11 | 119100779 | 119100819 | ActiveD_1330 | CTTGCCATCTGCTGCATGATCTTCCTGGGCTTTGCGGATG  | ATTO594 |
| chr11 | 119100821 | 119100861 | ActiveD_1331 | TGCCCGAGCCTCCCCCAGTTTGTGGCCCTGATAGGTGCC   | ATTO594 |
| chr11 | 119100863 | 119100903 | ActiveD_1332 | ATTCTTAAAAGGTGGAATGGGAGCAGGCTTGAGTCATGGA  | ATTO594 |
| chr11 | 119100905 | 119100945 | ActiveD_1333 | GGCTTGTGGGAGGGGCTAAGAAATTATCAGAAAAGACAG   | ATTO594 |
| chr11 | 119100947 | 119100987 | ActiveD_1334 | GGCTGGGACCTGGGAGGTACCTGAGAGAACTGGGGTTATT  | ATTO594 |
| chr11 | 119100989 | 119101029 | ActiveD_1335 | CCCCACCATGAAGTAAGTGGGTTCTGGGGGTGATTGCCT   | ATTO594 |
| chr11 | 119101031 | 119101071 | ActiveD_1336 | CCCTTCCTGAACTGCTTTGTGAAGGAGCAGTGTAAAGCAT  | ATTO594 |
| chr11 | 119101073 | 119101113 | ActiveD_1337 | GGTGCTGTTTTCTTATCATCCTCTTCTGCTTCATCCCTT   | ATTO594 |
| chr11 | 119101115 | 119101155 | ActiveD_1338 | TTGCTGCTGGGCCACAGCCCAGAATCCCAGGGAGTGATCA  | ATTO594 |
| chr11 | 119101157 | 119101197 | ActiveD_1339 | TAGTGAGTGACCACGCCCCCTTCTCTTCCCCCTCGCCC    | ATTO594 |

|       |           |           |              |                                          |         |
|-------|-----------|-----------|--------------|------------------------------------------|---------|
| chr11 | 119101199 | 119101239 | ActiveD_1340 | CGGGAATGAGAAGACCACTTTGGGTACTGTAACACCTGC  | ATTO594 |
| chr11 | 119101241 | 119101281 | ActiveD_1341 | TTCCTCCCTCCGCCCCCTCACCCTTACCAGAATAAAAA   | ATTO594 |
| chr11 | 119101283 | 119101323 | ActiveD_1342 | GTAGGGACCCTTGGGTATATCTGGGACTCTGGCAGTGGTG | ATTO594 |
| chr11 | 119101325 | 119101365 | ActiveD_1343 | AGAGGTGATGAGCAGAACTTACTCGCATTGGGGAAAGGAT | ATTO594 |
| chr11 | 119101367 | 119101407 | ActiveD_1344 | CACGTGAAGACTCAGAACTAACCCAGGCAGCCTGGAACTC | ATTO594 |
| chr11 | 119101409 | 119101449 | ActiveD_1345 | AGGAGTGGCTAGGGCAGGGGCGGGAACCGGGTGCTTGAC  | ATTO594 |
| chr11 | 119101451 | 119101491 | ActiveD_1346 | AGCAGCGGCACACGGGTCCGGGCAGGGGGCAAGGGCTAAG | ATTO594 |
| chr11 | 119101493 | 119101533 | ActiveD_1347 | CTGTGGTCAGGACCTCAACAAAACCAGCCGACAGCAGATG | ATTO594 |
| chr11 | 119101535 | 119101575 | ActiveD_1348 | CCTCATCCCGGCCTTCCGGGGCCACTTCATTGCTGCGCGC | ATTO594 |
| chr11 | 119101577 | 119101617 | ActiveD_1349 | CAATTTGATCGTCTCGCTGCTGGGATTTGTGGCCACAGTC | ATTO594 |
| chr11 | 119101619 | 119101659 | ActiveD_1350 | CACCATGTGGGCCTTCTCGGAATTGCCCATGCCGCTGCTG | ATTO594 |
| chr11 | 119101661 | 119101701 | ActiveD_1351 | CCCGTTACCTGAAGAGGCGGCGGAGCCGGGCCCTGACCG  | ATTO594 |
| chr11 | 119101703 | 119101743 | ActiveD_1352 | CCACTCCATACTGCTGAGGCCTCAGGACTGCTGCTCAGCT | ATTO594 |
| chr11 | 119101745 | 119101785 | ActiveD_1353 | TTGCTCAGATTGGTGTGGGAAGAGCCTGCCTGTGGGGAGC | ATTO594 |
| chr11 | 119101787 | 119101827 | ActiveD_1354 | CCCCGGTGTCCCGACGGCGGCTCAAGTCAGAGTTGCTGGG | ATTO594 |

|       |           |           |              |                                          |          |
|-------|-----------|-----------|--------------|------------------------------------------|----------|
| chr11 | 119105819 | 119105859 | ActiveE_1450 | AAGACCCTCTTCCCCAAGAATCCTTCAGGAACCCTCAGA  | ATTO647N |
| chr11 | 119105861 | 119105901 | ActiveE_1451 | CAGGTTATGCAGGAAGTTGTCCAGGTAGAAGCTTCCCTA  | ATTO647N |
| chr11 | 119105903 | 119105943 | ActiveE_1452 | GAGGAAGCTGTCAGTGGGAAGAGCAGCTAGGGTTTAGGGG | ATTO647N |
| chr11 | 119105945 | 119105985 | ActiveE_1453 | ATCAAGGGAGGAGAGAACTCAGGGCCAGAACCAGGGATGC | ATTO647N |
| chr11 | 119105987 | 119106027 | ActiveE_1454 | AGAGTCTGGGTTTCTAATCTCAAAGGGAGGAGAAGACATG | ATTO647N |
| chr11 | 119106029 | 119106069 | ActiveE_1455 | CCCATGCATTGTCCTGACTGCCAAATCAGTGGAGATTC   | ATTO647N |
| chr11 | 119106071 | 119106111 | ActiveE_1456 | GGGGAGAGGTGGGGGTGAATGAGGTAACCTCCTGTGGCCC | ATTO647N |
| chr11 | 119106113 | 119106153 | ActiveE_1457 | GGGGTAGCCTGGGCCTCCCTAGATTTCCCTGTAAGGAATG | ATTO647N |
| chr11 | 119106155 | 119106195 | ActiveE_1458 | TGACAGGTCAGCAACAGGTTTGTCTGAGCCAGAGGAGGTG | ATTO647N |
| chr11 | 119106197 | 119106237 | ActiveE_1459 | CAATGCCTTCTGAAGTGTGGGATGGCAGGGCTAGACAGAA | ATTO647N |
| chr11 | 119106239 | 119106279 | ActiveE_1460 | GTAGTTGTCTGAGGAATGAGCACATGAGAATAAGAGAATA | ATTO647N |
| chr11 | 119106281 | 119106321 | ActiveE_1461 | GGTAGGATGGAAAGGTGTTAAGTATCTTTCTCCCAAACCC | ATTO647N |

|       |           |           |              |                                           |          |
|-------|-----------|-----------|--------------|-------------------------------------------|----------|
| chr11 | 119106323 | 119106363 | ActiveE_1462 | ACATGTGGGAAGGTCTTTGGCACACAGTCCCTTTCTTAAA  | ATTO647N |
| chr11 | 119106365 | 119106405 | ActiveE_1463 | ATCCTGGGGGAATTCACATTCTCCCAAGAGCCCCTTCTTC  | ATTO647N |
| chr11 | 119106407 | 119106447 | ActiveE_1464 | TGAGGACAGGGGAAGGAAATACCTGCAAAGGATTCAAAG   | ATTO647N |
| chr11 | 119106449 | 119106489 | ActiveE_1465 | GTTGATTCAACCTCTACAGGACTGGGGCTCATCAATGCTT  | ATTO647N |
| chr11 | 119106491 | 119106531 | ActiveE_1466 | CAACCTCTGGCCTCAGAAGCCATCTTTTCCTAGACTCAAG  | ATTO647N |
| chr11 | 119106533 | 119106573 | ActiveE_1467 | TCCCAACAAGCTCCCAAGAAATGGTGCTGTAGGTACTG    | ATTO647N |
| chr11 | 119106575 | 119106615 | ActiveE_1468 | ATAGATTCAGCCACAAGACCTTGCCACTCTAAGTATGTGA  | ATTO647N |
| chr11 | 119106617 | 119106657 | ActiveE_1469 | TGGTAATGACAAGGGAGCTGGCAATGTAGCACTGGACTAT  | ATTO647N |
| chr11 | 119106659 | 119106699 | ActiveE_1470 | CCATAGTAACAGCTCCTGCCTATGGAGCACGTGTAGAGGG  | ATTO647N |
| chr11 | 119106743 | 119106783 | ActiveE_1472 | CCCATTAACCTCCTTGCTCGTGTAGGTTTGTCTGGAGAT   | ATTO647N |
| chr11 | 119106785 | 119106825 | ActiveE_1473 | TCATCACCTCCTTCTCTTGGAGCTTGGACCCAGAAACA    | ATTO647N |
| chr11 | 119106827 | 119106867 | ActiveE_1474 | AGAGGTTGAGAGTAGAACACCGAATTTGAATCCCCCAC    | ATTO647N |
| chr11 | 119106911 | 119106951 | ActiveE_1476 | GACGCAGAGCGTCCCTCCAGATAGAAGTGTCTGGCAGAG   | ATTO647N |
| chr11 | 119106953 | 119106993 | ActiveE_1477 | TAGCTTCCCATTTCTGGGGGAAGCTAGGCCAGGGTAAG    | ATTO647N |
| chr11 | 119106995 | 119107035 | ActiveE_1478 | TCACCGCCCCCTTCTCCCAACACCCCCAGACTCAGCGACT  | ATTO647N |
| chr11 | 119107037 | 119107077 | ActiveE_1479 | CGGACGCCTGTGAGGTTAAGAAGGAGGTGACCCCTGTGGA  | ATTO647N |
| chr11 | 119107079 | 119107119 | ActiveE_1480 | GCTGCCTTTGCTTTCCCTATGCTTGTAGATTTCCACAG    | ATTO647N |
| chr11 | 119107121 | 119107161 | ActiveE_1481 | CACACTCAGCTCAAGGCAAGAGTAACTTCACTTACCTAAG  | ATTO647N |
| chr11 | 55812948  | 55812988  | InactiveA_64 | AAAGTTCCAATGACACTGGAAACTAAAACAACAGCAAGAA  | ATTO647N |
| chr11 | 55812990  | 55813030  | InactiveA_65 | TGAAATTATTATGTTTTTCATCTATCATATAACATATTAT  | ATTO647N |
| chr11 | 55813284  | 55813324  | InactiveA_72 | ACAGAGATTAAAAGTCCTCTTATAAGTGTGAGTAAGCATG  | ATTO647N |
| chr11 | 55813368  | 55813408  | InactiveA_74 | AATTCAGAAATGTGGTTGGGGTACATATGGAAAGTAAAT   | ATTO647N |
| chr11 | 55813410  | 55813450  | InactiveA_75 | AGTCACAAAGAAAGCATCAATGGTGCATATAATTCAATAT  | ATTO647N |
| chr11 | 55813494  | 55813534  | InactiveA_77 | TTCACACGGTATCATAGTATAAAATTTTTCTGAATCTTGT  | ATTO647N |
| chr11 | 55813578  | 55813618  | InactiveA_79 | CACTTAAATAAGTACTTGTCTTTATTAAGTTTGCTTCCAC  | ATTO647N |
| chr11 | 55813620  | 55813660  | InactiveA_80 | TGTGATTCTTTTCTCATTTGCTGGCAAACCTTTGTTTTAAT | ATTO647N |
| chr11 | 55813746  | 55813786  | InactiveA_83 | AAGAATGTTACAGTGACTCTGTTATGGCTTTTAGTGGTA   | ATTO647N |

|       |          |          |               |                                           |          |
|-------|----------|----------|---------------|-------------------------------------------|----------|
| chr11 | 55813872 | 55813912 | InactiveA_86  | GTTTAGAGATAAAAGGTTTCCTTTTAGAGAAAATTTGGAA  | ATTO647N |
| chr11 | 55813998 | 55814038 | InactiveA_89  | AGAGACAATCTGATTAAGTGTGACAGTATTCTAGCTTCC   | ATTO647N |
| chr11 | 55814040 | 55814080 | InactiveA_90  | TAAACCAGTGGCAGCAATTTCAAATCTCTTCCTATGTGTC  | ATTO647N |
| chr11 | 55814124 | 55814164 | InactiveA_92  | TTTTTAGTATCTAGATAGAAACATACATGAGGCCTTTAAA  | ATTO647N |
| chr11 | 55814166 | 55814206 | InactiveA_93  | GACAACCATTAGTAGTAATCAATGATTTCTTATATTTTTT  | ATTO647N |
| chr11 | 55814376 | 55814416 | InactiveA_98  | CCTAATGATTGTTATGTTTCATTGAAGTCACCTTGATCCAC | ATTO647N |
| chr11 | 55814502 | 55814542 | InactiveA_101 | GAGAAGCATATGATAACTGGTTGATGACAAGTATTGTCC   | ATTO647N |
| chr11 | 55814544 | 55814584 | InactiveA_102 | TTCTTCATTGATTTTTCTGACTACTGTTGGTTGCAGTCCA  | ATTO647N |
| chr11 | 55814586 | 55814626 | InactiveA_103 | TATTAGCTCAGGTTTCATTCTTTTAGTGTCTTTTAGGCAA  | ATTO647N |
| chr11 | 55814670 | 55814710 | InactiveA_105 | TGTATTTGGCTTAGTGCTTCATTTTGTGTCATTGTATATA  | ATTO647N |
| chr11 | 55814796 | 55814836 | InactiveA_108 | ATTCAGATAAATATGGTTGTTATAAAAAGTTTACTTTGTTA | ATTO647N |
| chr11 | 55814838 | 55814878 | InactiveA_109 | ATTGTCTCAAAGGCATATTTTTTCCAGTTAGTTTGAATCA  | ATTO647N |
| chr11 | 55814922 | 55814962 | InactiveA_111 | CACTCATGCCAAAAGTGCACCTAACAAAATCATCATTATA  | ATTO647N |
| chr11 | 55814964 | 55815004 | InactiveA_112 | TTATCACTTTTTGATTGGAGAGTCTTTAATGTTTGAACCA  | ATTO647N |
| chr11 | 55815132 | 55815172 | InactiveA_116 | GCAGGCCAAAAGTATCGACTTCTGATTAGAGTATTTTCATT | ATTO647N |
| chr11 | 55815174 | 55815214 | InactiveA_117 | TCCCTTCAGTTCCTCCAGGGCATGGCGATGCTGAAGTACA  | ATTO647N |
| chr11 | 55815216 | 55815256 | InactiveA_118 | GTCTTCCCGCTCCACCCAGTTAGATCCCACTTGATTCCCT  | ATTO647N |
| chr11 | 55815258 | 55815298 | InactiveA_119 | AAGCAGACCTAGAGAAAAAGTTGAAATTTGAGCGCATTGT  | ATTO647N |
| chr11 | 55815342 | 55815382 | InactiveA_121 | TATGGGAAGATCAGATAAAATTAAGAACTCATGTAAGTAT  | ATTO647N |
| chr11 | 55815384 | 55815424 | InactiveA_122 | AATTAGAAAGCACTCTTTCTAAACAATTGGCCTATTGGCA  | ATTO647N |
| chr11 | 55815426 | 55815466 | InactiveA_123 | TGAGCCACCATGCTCCGCCCAAGCCTTCCCTATTAAAAAA  | ATTO647N |
| chr11 | 55818240 | 55818280 | InactiveB_190 | CAAGAAAGATGTTAATTTACATGCAAGACCAACATATTCA  | ATTO594  |
| chr11 | 55818282 | 55818322 | InactiveB_191 | ATATCTATTCACATAACCCACCCAAATTTTTAGACGGCCT  | ATTO594  |
| chr11 | 55818324 | 55818364 | InactiveB_192 | GCTATCATATCTGTAATCTCTTTCTCTATCATAATAGACA  | ATTO594  |
| chr11 | 55818450 | 55818490 | InactiveB_195 | TATGAAGGAGAAGAACTAAAAGTGGAGATAGTACAGCAA   | ATTO594  |
| chr11 | 55818492 | 55818532 | InactiveB_196 | CCTTCAAGACACATTATATATTCATTGTGTCCATCTATTA  | ATTO594  |
| chr11 | 55818576 | 55818616 | InactiveB_198 | GTGTAAGAGTCTGACTTGCAAAGTCCCTTTTCTTCTAGG   | ATTO594  |

|       |          |          |               |                                            |          |
|-------|----------|----------|---------------|--------------------------------------------|----------|
| chr11 | 55818702 | 55818742 | InactiveB_201 | TAAGCAGACTAGAGAATCTACATAGTCCAGTGACAGTTAC   | ATTO594  |
| chr11 | 55818744 | 55818784 | InactiveB_202 | TACTAACACATTCCCTTCATTAATAACCATACTTTCAATT   | ATTO594  |
| chr11 | 55818786 | 55818826 | InactiveB_203 | CCTTTACCCGCACCAAACCTCTGCTCCATTATCTAGGTCTGA | ATTO594  |
| chr11 | 55818828 | 55818868 | InactiveB_204 | CTGTGACTAGGGTTTTGATCCTTGAACCTCCTAGACATGTA  | ATTO594  |
| chr11 | 55818870 | 55818910 | InactiveB_205 | TGAATTTCCCTATCGATATGCCCAGGAAGGCCAATCTACAC  | ATTO594  |
| chr11 | 55818912 | 55818952 | InactiveB_206 | TTCTTTATTCTATAGGTGACAAAGTAGAAGCCAGAGAAGC   | ATTO594  |
| chr11 | 55818954 | 55818994 | InactiveB_207 | AAATAATAAATATCGAATAGTCAATACAGATACCCTTGTT   | ATTO594  |
| chr11 | 55818996 | 55819036 | InactiveB_208 | AATCAGGCTGTACTAATTATCAATCCTTCCTCATTGCTTG   | ATTO594  |
| chr11 | 55819038 | 55819078 | InactiveB_209 | CAAATAACAGCTGAACTAATTGTTTCAGAGCGTATGCTCC   | ATTO594  |
| chr11 | 55819080 | 55819120 | InactiveB_210 | ATATAGCAGTTTAATGTTTGTCTGACCCAGAAAATTTGAC   | ATTO594  |
| chr11 | 55819164 | 55819204 | InactiveB_212 | TAGTTTTCACATAATTTGTTTATACGATGACATTAECTAT   | ATTO594  |
| chr11 | 55819248 | 55819288 | InactiveB_214 | CTACATAAATGATCTTCCTCGTATAATATGATGACTGATT   | ATTO594  |
| chr11 | 55819500 | 55819540 | InactiveB_220 | ACGGCTCCTGAAGGATGAAGCAAATATCTCTTCCGGAATC   | ATTO594  |
| chr11 | 55819584 | 55819624 | InactiveB_222 | CTGTTTCTTCGAATCTGAAAGTTAGTTCTGAAAACAAAAA   | ATTO594  |
| chr11 | 55819626 | 55819666 | InactiveB_223 | ACGTGGTCCCACCTTGTATTTCTATCAGTCAGCAGCATCGC  | ATTO594  |
| chr11 | 55819710 | 55819750 | InactiveB_225 | GCACAGTGACATTGTAGATGGCCAGAAAACCAGGAAGAG    | ATTO594  |
| chr11 | 55819752 | 55819792 | InactiveB_226 | TGGGGTTGATTTTGTATGATCACAATCAACCCAATATTCCC  | ATTO594  |
| chr11 | 55819878 | 55819918 | InactiveB_229 | CTAAAAATGAAATGGTTCTGTCTTTGACAACAAGGTTAC    | ATTO594  |
| chr11 | 55820004 | 55820044 | InactiveB_232 | GGGACATGTAACTGTGTAGAGCAGAGGGTTGCAAATGGC    | ATTO594  |
| chr11 | 55820046 | 55820086 | InactiveB_233 | CCCAGGCATAGGATCCCACAACCAGCAGCACGCAGAGTTT   | ATTO594  |
| chr11 | 55820172 | 55820212 | InactiveB_236 | TGTAAGTATCAGAGCAAGAAAGGGAGAGTAGTGAGGAGAA   | ATTO594  |
| chr11 | 55820214 | 55820254 | InactiveB_237 | TTTCATTAAGGTGGCAAGAAAGAATAGCAGCCACTGGTT    | ATTO594  |
| chr11 | 55820256 | 55820296 | InactiveB_238 | CAATGAACGCATAAGATGTGAGAACGATGAGTAGTGTGCT   | ATTO594  |
| chr11 | 55820298 | 55820338 | InactiveB_239 | TGCGGCGCCCACTGACTGAACGCATCTTGAGGATGGTTAC   | ATTO594  |
| chr11 | 55823448 | 55823488 | InactiveC_314 | CGGGGGTTACAGACCACCTTGGGCATAATGGAAGAACCTT   | ATTO647N |
| chr11 | 55823532 | 55823572 | InactiveC_316 | ATAGAACCTTGCCCAGGTGTGGTGATTAATGCCCTGATC    | ATTO647N |
| chr11 | 55823574 | 55823614 | InactiveC_317 | CTTTTCATTGAAAAGAATCGCAGTTGACATGTACTATAGC   | ATTO647N |



|       |          |          |               |                                           |          |
|-------|----------|----------|---------------|-------------------------------------------|----------|
| chr11 | 55823616 | 55823656 | InactiveC_318 | CAAATCCATGATATGACTTGTTTTCTATGGTGTTTGTA    | ATTO647N |
| chr11 | 55823658 | 55823698 | InactiveC_319 | TGTTATTCATGAGGGTTGAAGTTGTCTTTAATCGAAACAC  | ATTO647N |
| chr11 | 55823742 | 55823782 | InactiveC_321 | GATTTCTCTAATCCATTACATACTTACCATGTGAATCACTC | ATTO647N |
| chr11 | 55823784 | 55823824 | InactiveC_322 | ATTCTCACACAGCTTTTTCTCTCGCTCTTTAAAAAAGCAT  | ATTO647N |
| chr11 | 55823826 | 55823866 | InactiveC_323 | CTGCATTGTAGGAGGCTTTCTGGGTTTCCTTTTGTAECTA  | ATTO647N |
| chr11 | 55823910 | 55823950 | InactiveC_325 | AAGAGAAACCAACATTTCAATAATTCCATTGATATAAGC   | ATTO647N |
| chr11 | 55823952 | 55823992 | InactiveC_326 | CAACCTGAATGAGCAGTGTTCAAAGCACAGTCTGTGTGCC  | ATTO647N |
| chr11 | 55823994 | 55824034 | InactiveC_327 | TCTCCCCAAGTTCTGCTTCCTTCTTGACTAATACAGCAAT  | ATTO647N |
| chr11 | 55824036 | 55824076 | InactiveC_328 | CTATTCAATGCTAGTGGCCATTAATGGGAATATCTCAAG   | ATTO647N |
| chr11 | 55824078 | 55824118 | InactiveC_329 | GGAAGAGCAGAGCTCCAGAGTGGTACCGGGGGTGCAGACT  | ATTO647N |
| chr11 | 55824120 | 55824160 | InactiveC_330 | TCAAGTGTGGCTTTTTGGCTTGTGCCATCTGTGCAACCAT  | ATTO647N |
| chr11 | 55824162 | 55824202 | InactiveC_331 | AACTCACCCACAGTCACACATAGAATCCCTGATAGAGACA  | ATTO647N |
| chr11 | 55824204 | 55824244 | InactiveC_332 | ATTTCCCCTTTCAAATAAGGTTATAGAGGCACAGCAGGT   | ATTO647N |
| chr11 | 55824246 | 55824286 | InactiveC_333 | ACACATTTTATCTTCATAAACTGGTTGACATTAGTACTG   | ATTO647N |
| chr11 | 55824288 | 55824328 | InactiveC_334 | GTA CTGCTCATGTACCAGATACTATTCTAAATACAATTAT | ATTO647N |
| chr11 | 55824330 | 55824370 | InactiveC_335 | GAATACTAATAATTGCTGATACTAATACTAATAATTTACT  | ATTO647N |
| chr11 | 55824372 | 55824412 | InactiveC_336 | AAATACCAGAAAGGGGTGGGGATAAAGGAGTCCCTTTTACT | ATTO647N |
| chr11 | 55824456 | 55824496 | InactiveC_338 | TAAATAGGCATTATAAAATTTGTTTCACACTCAAAGCTC   | ATTO647N |
| chr11 | 55824498 | 55824538 | InactiveC_339 | TGAGCCAGTACTCACATTGCCATTTTCATGTTATGAAATTA | ATTO647N |
| chr11 | 55824540 | 55824580 | InactiveC_340 | AAATTGCATAACATTGTATGCCACATCCAAGCATTGCCTC  | ATTO647N |
| chr11 | 55824582 | 55824622 | InactiveC_341 | CATATTATTATAATGTAACACAATTACATTCAGACTTCAT  | ATTO647N |
| chr11 | 55824666 | 55824706 | InactiveC_343 | CAAGGAAACCATCCTATCCTGGGACTCCAACAATTATTGA  | ATTO647N |
| chr11 | 55825002 | 55825042 | InactiveC_351 | AAATTATCTAATACCATTACCATCCTTTTGAATTCCCCTT  | ATTO647N |
| chr11 | 55825170 | 55825210 | InactiveC_355 | CTAATAGCTGTTATAAGATGTTTGGTTTTACAGATTAAT   | ATTO647N |
| chr11 | 55825212 | 55825252 | InactiveC_356 | AAGTGCTTATGCCAATGTCTTCACACTGCTTTACATCTCA  | ATTO647N |
| chr11 | 55825296 | 55825336 | InactiveC_358 | TAGGAAAATCTCCATGCAGTCTTAACCAAGTCGCATGGAC  | ATTO647N |
| chr11 | 55825338 | 55825378 | InactiveC_359 | CCGTGGGCCTCCTACTGCCACCCTCAGCACTAGGATGACT  | ATTO647N |

|       |          |          |               |                                           |         |
|-------|----------|----------|---------------|-------------------------------------------|---------|
| chr11 | 55828698 | 55828738 | InactiveD_439 | TAGAGTCCGCTGCAATTATTATTTTCGTCATCTATCAAAT  | ATTO594 |
| chr11 | 55828740 | 55828780 | InactiveD_440 | AGCTCTTTTTATGTGATTCCAGCTTCCTTAATGCAATTC   | ATTO594 |
| chr11 | 55828782 | 55828822 | InactiveD_441 | GAGAGAGAGACAATAAATTATGTTCCAGGGATTATTC     | ATTO594 |
| chr11 | 55828950 | 55828990 | InactiveD_445 | TTTAGGGTTAGTATGAAGATAAGCAGTAAAGATAAAGTGA  | ATTO594 |
| chr11 | 55828992 | 55829032 | InactiveD_446 | TAAAAGTCATAAGTGTGAGTAAGCATCTCTTCATCAATAG  | ATTO594 |
| chr11 | 55829118 | 55829158 | InactiveD_449 | GCATTAATGGTGCATATAATTCAACAGGGAATTAAGAAAT  | ATTO594 |
| chr11 | 55829160 | 55829200 | InactiveD_450 | AATGAGGAAATTGACATAAGTCGTAATGGAATCACAAATA  | ATTO594 |
| chr11 | 55829244 | 55829284 | InactiveD_452 | TCGGTTTTGAAAACTCAAACCTATTGCTTTTCTAATATT   | ATTO594 |
| chr11 | 55829286 | 55829326 | InactiveD_453 | AATTACTTGACAAATTAAAAAACCAGGGTCAAACACCCAA  | ATTO594 |
| chr11 | 55829412 | 55829452 | InactiveD_456 | CACTGAGTCTCTTCCTGATGTCAGTAAGTACACATATGCT  | ATTO594 |
| chr11 | 55829454 | 55829494 | InactiveD_457 | AGTTAAATAAACCCCAAGCTTCAATGACTTCATTTAGATA  | ATTO594 |
| chr11 | 55829496 | 55829536 | InactiveD_458 | TAAAAACTTCTCATATGCCACTGATGATGAAGTAGATAA   | ATTO594 |
| chr11 | 55829580 | 55829620 | InactiveD_460 | TAATCTGCATAGTAATCCCAATATGCTTACCATAAATTCA  | ATTO594 |
| chr11 | 55829622 | 55829662 | InactiveD_461 | ACAATGTGGACCAACTCACAGTTCTTGAAGTCTCTCGAAA  | ATTO594 |
| chr11 | 55829664 | 55829704 | InactiveD_462 | ATTTGTTTTCTAAGTAGACCATGACTGCTAGAACATTCCG  | ATTO594 |
| chr11 | 55829706 | 55829746 | InactiveD_463 | GCCTCTAATCGCTAACATTTTCATGAATTAGATCCTGCAGA | ATTO594 |
| chr11 | 55829748 | 55829788 | InactiveD_464 | ACAATCTTTAATAATACAGCATCTCCTGTGTGCTCTTTT   | ATTO594 |
| chr11 | 55829790 | 55829830 | InactiveD_465 | TTGCCCTCTAATATCAAGAGCAATAGTTACTTCCTAAAGT  | ATTO594 |
| chr11 | 55829832 | 55829872 | InactiveD_466 | TCCACGAAGCTCTGAGGTTCTGGGGACAATGTTTCTTCCC  | ATTO594 |
| chr11 | 55829874 | 55829914 | InactiveD_467 | TGTCTCTTCCTCAAGGGATTAACACCCGGCGGACTGAGCTG | ATTO594 |
| chr11 | 55829916 | 55829956 | InactiveD_468 | AGTCCTAACCCAGCCTCAGAGGCCCTGACACACTAAGCGT  | ATTO594 |
| chr11 | 55829958 | 55829998 | InactiveD_469 | GGACCATGTCTGAGCGTGCCACAGGACACTGGAAATCTGC  | ATTO594 |
| chr11 | 55830000 | 55830040 | InactiveD_470 | CCTCTTCAGAGGCAGGAGCAGCCATCTAGCACAGCCTTCT  | ATTO594 |
| chr11 | 55830042 | 55830082 | InactiveD_471 | AGCCACAGTGGATACTTGGTGTGTTCCAGCTTTCCATGAT  | ATTO594 |
| chr11 | 55830168 | 55830208 | InactiveD_474 | TTAGATCCGCCAGAGGAAGTAAGGGGGTAAGGGGAGGAG   | ATTO594 |
| chr11 | 55830210 | 55830250 | InactiveD_475 | TGCAAACCTGTATTCCCAGATGTCCTATCTAGCTGCCTTC  | ATTO594 |
| chr11 | 55830252 | 55830292 | InactiveD_476 | CCACTCTCCTAGTCCTTATGCTGTGATCTTGCTGCTGGGG  | ATTO594 |
| chr11 | 55830294 | 55830334 | InactiveD_477 | CCTCAGAAGCTGTGTTTGTGAACCTAGTCTCATTTTCAT   | ATTO594 |

|       |          |          |               |                                                   |          |
|-------|----------|----------|---------------|---------------------------------------------------|----------|
| chr11 | 55830336 | 55830376 | InactiveD_478 | AGAGGGTTTTCTTGTACCCTGTGCATTGTACACCGCAAG           | ATTO594  |
| chr11 | 55830378 | 55830418 | InactiveD_479 | GTTTCAGATACAGAAAGATGTACACACTCTAGGTAATAGGA         | ATTO594  |
| chr11 | 55833528 | 55833568 | InactiveE_554 | TTGCATTTGAATCCATACCATATTTAATCTATTCTAAGTC          | ATTO647N |
| chr11 | 55833570 | 55833610 | InactiveE_555 | CATTGTTGTTCTTTTTCCCAACAGAATTCTAGCAAAGATC          | ATTO647N |
| chr11 | 55833654 | 55833694 | InactiveE_557 | GGTATGAATATCTAATAGTTGTGAATTGAAAAGTCTTGAC          | ATTO647N |
| chr11 | 55833696 | 55833736 | InactiveE_558 | CCTACCTTAAGCCTTACCTTATGGTATGATCCTCACATCT          | ATTO647N |
| chr11 | 55833738 | 55833778 | InactiveE_559 | ATTACGTTATAGCCTCCTGATTTTCACTCTGTACTIONTAG         | ATTO647N |
| chr11 | 55833780 | 55833820 | InactiveE_560 | AGACCATATGTTAGTTGCCACAGCCAGAAATAAATCACAG          | ATTO647N |
| chr11 | 55833822 | 55833862 | InactiveE_561 | GCTCTCTGATACTCTTCATGTTAGGAGTAAGGCTATGGTT          | ATTO647N |
| chr11 | 55833948 | 55833988 | InactiveE_564 | AAATTATTCATCTTTACCTCTGTATCCACCTCAGATATT           | ATTO647N |
| chr11 | 55833990 | 55834030 | InactiveE_565 | ATGGCTTTCTCTCTAACTAGAGTGTGGATTCTGGAGATA           | ATTO647N |
| chr11 | 55834032 | 55834072 | InactiveE_566 | CTCAGGTCACAGTGTGACGTAGCTATCTGCTTATACATTT          | ATTO647N |
| chr11 | 55834074 | 55834114 | InactiveE_567 | GGGTACTIONACAATTTCTGTGAACAGCCTGTATTTTATTGT        | ATTO647N |
| chr11 | 55834116 | 55834156 | InactiveE_568 | TGAGACATTTTCTGACTCCTCCCAACCAAGTTCAGTATTT          | ATTO647N |
| chr11 | 55834158 | 55834198 | InactiveE_569 | TTATCCATACAGCAAACATTGCTGAGTTGTGAAACTIONTC         | ATTO647N |
| chr11 | 55834200 | 55834240 | InactiveE_570 | TGGCTCCCAACAACTIONTAGTCCACTGCTAAATTGTCATTTA       | ATTO647N |
| chr11 | 55834830 | 55834870 | InactiveE_585 | ACAATAGGATTATTTCCCCAGCATGTAAATCTTAGTGATTT         | ATTO647N |
| chr11 | 55834914 | 55834954 | InactiveE_587 | TGTAAAACATGCAAATCTCACCAACTIONTCATGAGTTGTGC        | ATTO647N |
| chr11 | 55834956 | 55834996 | InactiveE_588 | AACTGCAACAATTTGGATAATTAACGTGTAATCAAATTGT          | ATTO647N |
| chr11 | 55835124 | 55835164 | InactiveE_592 | GAGAAAGTGGACCATGTGAATATACTIONATTCCAAAAT           | ATTO647N |
| chr11 | 55835166 | 55835206 | InactiveE_593 | ATGCCTATACTIONGGGAGTTTTTGCAGGGCTGATATAATAA        | ATTO647N |
| chr11 | 55835250 | 55835290 | InactiveE_595 | TCACTIONCCACTAAAATAACTIONCTTTACAAATAAATIONCTAC    | ATTO647N |
| chr11 | 55835292 | 55835332 | InactiveE_596 | TTGGTCTTATGCCTATAAATTTACTIONCTTATATATGCC          | ATTO647N |
| chr11 | 55835334 | 55835374 | InactiveE_597 | CATTTTATAATTTAACACTIONTGCACTIONTTCATAGCCTCCA      | ATTO647N |
| chr11 | 55835460 | 55835500 | InactiveE_600 | TCCTCTTTGGTTCTGATTTACCATATAAATTTCACTIONCAAGC      | ATTO647N |
| chr11 | 55835544 | 55835584 | InactiveE_602 | CTGATGTTGTTGCAAACACTIONCCACACTIONCTGTAAACAAA      | ATTO647N |
| chr11 | 55835586 | 55835626 | InactiveE_603 | CATAAGAAACTIONTACGTCTIONCTACAACCAACTIONATATTAAGGT | ATTO647N |

|       |          |          |               |                                           |          |
|-------|----------|----------|---------------|-------------------------------------------|----------|
| chr11 | 55835628 | 55835668 | InactiveE_604 | GGACAGGACTGCAAACGTTTGGAAATTTGTTTCTCAGTGTC | ATTO647N |
| chr11 | 55835670 | 55835710 | InactiveE_605 | GCCAAGGATATTAGATGCAGATCCGATCTTCATGTATAGA  | ATTO647N |
| chr11 | 55835712 | 55835752 | InactiveE_606 | GAGATTCTTCCTTCAGGTCTCTCATCTGCTTAGTTAATTA  | ATTO647N |
| chr11 | 55835754 | 55835794 | InactiveE_607 | TAACTGTTCTCTCTGTTACACTAACCACACAAGAGATGCA  | ATTO647N |
| chr11 | 55835796 | 55835836 | InactiveE_608 | TATTTCTTATATATCTACCATGCCCTTGGTCTTTGCAAAT  | ATTO647N |
